# Supplementary material for: Automated assessment of chest CT severity scores in patients suspected of COVID-19 infection
Source: bioRxiv or medRxiv preprint supplement (doi:10.1101/2022.12.28.22284027), 2022-12-30
Supplement: Supplementary file [file media-1.pdf]

## **Automated assessment of chest CT severity scores in patients suspected of COVID-19 infection**

Pranav Ajmera<sup>1</sup>, Snehal Rathi<sup>2</sup>, Udayan Dosi<sup>1</sup>, Suvarna Lakshmi Kalli<sup>1</sup>, Avinav Luthra<sup>1</sup>, Sanjay Khaladkar<sup>1</sup>, Richa Pant<sup>3\*</sup>, Jitesh Seth<sup>3</sup>, Pranshu Mishra<sup>3</sup>, Manish Gawali<sup>3</sup>, Yash Pargaonkar<sup>3</sup>, Viraj Kulkarni<sup>3</sup>, Amit Kharat<sup>3</sup>

<sup>1</sup>: Dr. DY Patil Medical College, Hospital and Research Center, DY Patil Vidyapeeth, Pune, India

<sup>2</sup>: MGM Institute of Health Sciences, Navi Mumbai, India

<sup>3</sup>: DeepTek Medical Imaging Pvt. Ltd., Pune, India

**\*Corresponding author:** [richa.pant@deeptek.ai](mailto:richa.pant@deeptek.ai)

**Supplementary Figures:**

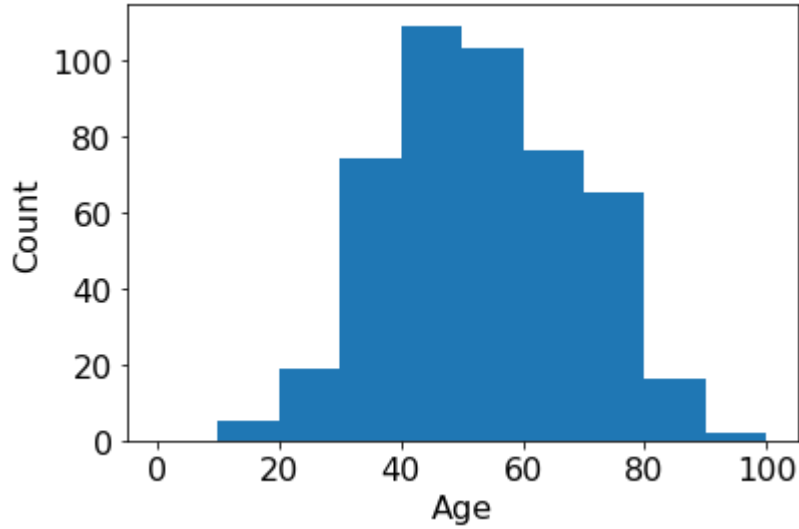

**Supplementary Figure 1:** Age distribution of COVID-19-affected patients.

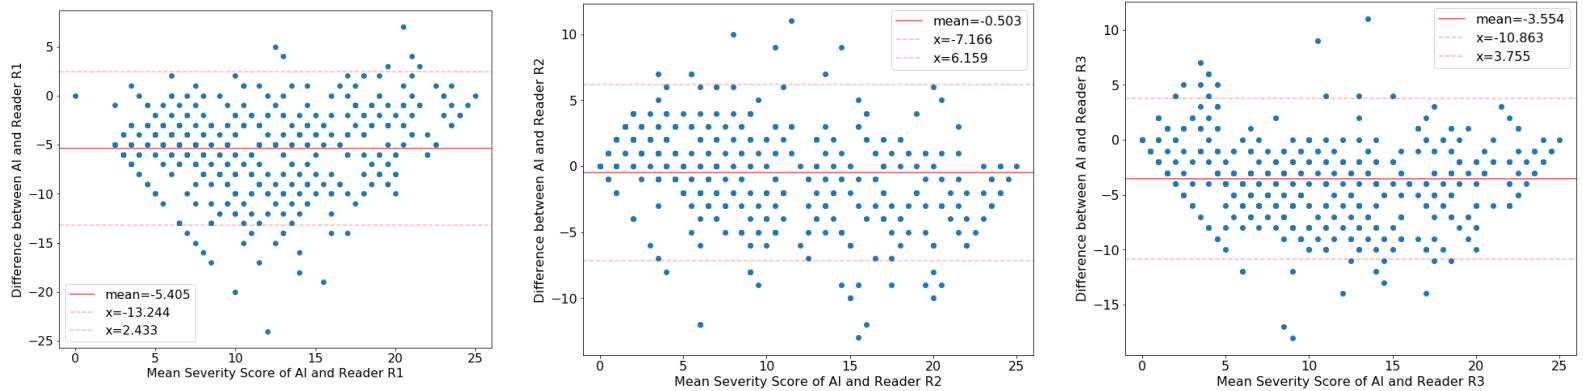

**Supplementary Figure 2:** B–A plot illustrating the agreement test for CTSS calculation between the individual readers and the AI model. The plots elucidate the difference in the CTSS reported by the individual reader and calculated by the AI model (y-axis) over the mean CTSS reported by the individual reader and calculated by the AI model (x-axis). The value of the mean difference (red solid line) and the upper and lower limits of 95% agreement (red dotted lines) are shown.
